# Supplementary material for: Nurses’ perceptions towards the delivery and feasibility of a behaviour change intervention to enhance physical activity in patients at risk for cardiovascular disease in primary care: a qualitative study
Source: Springer Nature journal article supplement (doi:10.1186/s12875-018-0888-1), 2018-12-01
Supplement: MOESM2 [file 16336682]

## Additional file 2. Checklist of Criteria for Good Thematic Analysis: 15-point checklist

Adapted from: Braun, V., & Clarke, V. Using thematic analysis in psychology. *Qualitative research in psychology*.2006; 3(2), 77-101.

| Process        | Criteria                                                                                                                                                            | Comment                |
|----------------|---------------------------------------------------------------------------------------------------------------------------------------------------------------------|------------------------|
| Transcription  | 1. The data have been transcribed to an appropriate level of detail, and the transcripts have been checked against the tapes for 'accuracy'.                        | Reported in manuscript |
| Coding         | 2. Each data item has been given equal attention in the coding process.                                                                                             | Yes                    |
|                | 3. Themes have not been generated from a few vivid examples (an anecdotal approach), but instead the coding process has been thorough, inclusive and comprehensive. | Reported in manuscript |
|                | 4. All relevant extracts for all each theme have been collated.                                                                                                     | Reported in manuscript |
|                | 5. Themes have been checked against each other and back to the original data set.                                                                                   | Reported in manuscript |
|                | 6. Themes are internally coherent, consistent, and distinctive.                                                                                                     | Reported in manuscript |
| Analysis       | 7. Data have been analysed – interpreted, made sense of - rather than just paraphrased or described.                                                                | Reported in manuscript |
|                | 8. Analysis and data match each other – the extracts illustrate the analytic claims.                                                                                | Reported in manuscript |
|                | 9. Analysis tells a convincing and well-organised story about the data and topic.                                                                                   | Reported in manuscript |
|                | 10. A good balance between analytic narrative and illustrative extracts is provided.                                                                                | Reported in manuscript |
| Overall        | 11. Enough time has been allocated to complete all phases of the analysis adequately, without rushing a phase or giving it a once-over-lightly.                     | Yes                    |
| Written report | 12. The assumptions about, and specific approach to, thematic analysis are clearly explicated.                                                                      | Reported in manuscript |
|                | 13. There is a good fit between what you claim you do, and what you show you have done – i.e., described method and reported analysis are consistent.               | Reported in manuscript |
|                | 14. The language and concepts used in the report are consistent with the epistemological position of the analysis.                                                  | Reported in manuscript |
|                | 15. The researcher is positioned as <i>active</i> in the research process; themes do not just 'emerge'.                                                             | Reported in manuscript |
