# Supplementary material for: Nurses’ perceptions towards the delivery and feasibility of a behaviour change intervention to enhance physical activity in patients at risk for cardiovascular disease in primary care: a qualitative study
Source: BMC Fam Pract. 2018 Dec 12;19:194. doi: 10.1186/s12875-018-0888-1 (PMC6292042; doi:10.1186/s12875-018-0888-1)
Supplement: Supplementary file 3 — Consolidated criteria for reporting qualitative studies (COREQ). 32-item consolidated criteria for reporting qualitative studies (COREQ) (PDF 289 kb) [file 12875_2018_888_MOESM3_ESM.pdf]

**Additional file 3. Consolidated criteria for reporting qualitative studies (COREQ): 32-item checklist**

Adapted from: Tong A, Sainsbury P, Craig J. Consolidated criteria for reporting qualitative research (COREQ): a 32-item checklist for interviews and focus groups. *International Journal for Quality in Health Care*. 2007; 19 (6): 349-57.

| No. Item                                       | Guide questions/description                                           | Comment                                     |
|------------------------------------------------|-----------------------------------------------------------------------|---------------------------------------------|
| <b>Domain 1: Research team and reflexivity</b> |                                                                       |                                             |
| <i>Personal Characteristics</i>                |                                                                       |                                             |
| 1. Interviewer/facilitator                     | Which author/s conducted the interview or focus group?                | Reported in manuscript                      |
| 2. Credentials                                 | What were the researcher's credentials?                               | Reported in manuscript (author credentials) |
| 3. Occupation                                  | What was their occupation at the time of the study?                   | Reported in manuscript (author credentials) |
| 4. Gender                                      | Was the researcher male or female?                                    | Reported in manuscript (author credentials) |
| 5. Experience and training                     | What experience or training did the researcher have?                  | Completed a course on qualitative research  |
| <i>Relationship with participants</i>          |                                                                       |                                             |
| 6. Relationship established                    | Was a relationship established prior to study commencement?           | Reported in manuscript                      |
| 7. Participant knowledge of the interviewer    | What did the participants know about the researcher?                  | Reported in manuscript                      |
| 8. Interviewer characteristics                 | What characteristics were reported about the interviewer/facilitator? | Reported in manuscript                      |
| <b>Domain 2: study design</b>                  |                                                                       |                                             |
| <i>Theoretical framework</i>                   |                                                                       |                                             |
| 9. Methodological orientation and Theory       | What methodological orientation was stated to underpin the study?     | Reported in manuscript                      |
| <i>Participant selection</i>                   |                                                                       |                                             |
| 10. Sampling                                   | How were participants selected?                                       | Reported in manuscript                      |
| 11. Method of approach                         | How were participants approached?                                     | Reported in manuscript                      |
| 12. Sample size                                | How many participants were in the study?                              | Reported in manuscript                      |
| 13. Non-participation No none participants     | How many people refused to participate or dropped out? Reasons?       | Reported in manuscript                      |
| <i>Setting</i>                                 |                                                                       |                                             |
| 14. Setting of data collection                 | Where was the data collected?                                         | Reported in manuscript                      |

Westland et al. Nurses' perceptions towards the delivery and feasibility of a behaviour change intervention to enhance physical activity in patients at risk for cardiovascular disease in primary care: a qualitative study

|                                        |                                                                                                         |                                                          |
|----------------------------------------|---------------------------------------------------------------------------------------------------------|----------------------------------------------------------|
| 15. Presence of non-participants       | Was anyone else present besides the participants and researchers?                                       | No                                                       |
| 16. Description of sample              | What are the important characteristics of the sample?                                                   | Reported in manuscript                                   |
| <i>Data collection</i>                 |                                                                                                         |                                                          |
| 17. Interview guide                    | Were questions, prompts, guides provided by the authors? Was it pilot tested?                           | Interview guide reported in manuscript. Not pilot tested |
| 18. Repeat interviews                  | Were repeated interviews carried out?                                                                   | Reported in manuscript                                   |
| 19. Audio/visual recording             | Did the research use audio or visual recording to collect the data?                                     | Reported in manuscript                                   |
| 20. Field notes                        | Were field notes made during and/or after the interview or focus group?                                 | Reported in manuscript                                   |
| 21. Duration                           | What was the duration of the interviews or focus group?                                                 | Reported in manuscript                                   |
| 22. Data saturation                    | Was data saturation discussed?                                                                          | Reported in manuscript                                   |
| 23. Transcripts returned               | Were transcripts returned to participants for comment and/or correction?                                | No because of burden to participants                     |
| <b>Domain 3: analysis and findings</b> |                                                                                                         |                                                          |
| <i>Data analysis</i>                   |                                                                                                         |                                                          |
| 24. Number of data coders              | How many data coders coded the data?                                                                    | Reported in manuscript                                   |
| 25. Description of the coding tree     | Did authors provide a description of the coding tree?                                                   | Reported in manuscript                                   |
| 26. Derivation of themes               | Were themes identified in advance or derived from the data?                                             | Reported in manuscript                                   |
| 27. Software What software             | What software, if applicable, was used to manage the data?                                              | Reported in manuscript                                   |
| 28. Participant checking               | Did participants provide feedback on the findings?                                                      | No because of burden to participants                     |
| <i>Reporting</i>                       |                                                                                                         |                                                          |
| 29. Quotations presented               | Were participant quotations presented to illustrate the themes/findings? Was each quotation identified? | Reported in manuscript                                   |
| 30. Data and findings consistent       | Was there consistency between the data presented and the findings?                                      | Reported in manuscript                                   |
| 31. Clarity of major themes            | Were major themes clearly presented in the findings?                                                    | Reported in manuscript                                   |
| 32. Clarity of minor themes            | Is there a description of diverse                                                                       | Reported in                                              |

|  |                                      |            |
|--|--------------------------------------|------------|
|  | cases or discussion of minor themes? | manuscript |
|--|--------------------------------------|------------|
